# Supplementary material for: Effects of oxygen coverage, catalyst size, and core composition on Pt-alloy core–shell nanoparticles for oxygen reduction reaction
Source: Royal Society of Chemistry journal article supplement (doi:10.1039/c5cy02287h), 2016-01-01
Supplement: c5cy02287h1.pdf [file c5cy02287h1.pdf]

### Supplementary Information

Effects of oxygen coverage, catalyst size, and core composition on Pt-alloy core-shell nanoparticles for  
the oxygen reduction reaction

Supareak Praserttham and Perla B. Balbuena\*

Department of Chemical Engineering

Texas A&M University, College Station, TX 77843

\*[balbuena@tamu.edu](mailto:balbuena@tamu.edu)

#### Notation

$E_{\text{sys}}$  = energy of the selected system (eV)

$E_{\text{O/sys}}$  = energy of the oxygen-adsorbed selected system (eV)

$E_{\text{ads,sys}}$  = adsorption energy of oxygen atom on the selected system (eV)

$E_{\text{seg(A-B)}}$  = segregation energy of the system of A and B segregated pair (eV/atom/pair)

$E_{\text{dis,sys}}$  = dissolution energy of the selected system (eV)

$E_{\text{sys,0}}$  = energy of the system before dissolution (eV)

$E_{\text{sys,+}}$  = energy of the system after dissolution (eV)

$\Delta E_{\text{dis}}$  = dissolution energy shift of the system from pure Pt system (eV)

$E_{\text{dis,alloy}}$  = dissolution energy of the core-shell system (eV)

$E_{\text{dis,Pt}}$  = dissolution energy of the pure Pt system (eV)

**Table I. Adsorption energy of the 116-atom  $\text{Pt}_{\text{shell}}(\text{M-Ni})_{\text{core}}$  nanoparticle system.**

| $\text{Pt}_{\text{shell}}(\text{M-Ni})_{\text{core}}$ | $E_{\text{sys}}$ (eV) | $E_{\text{O/sys}}$ (eV) | $E_{\text{ads}}(\text{sys})$ (eV) | $E_{\text{ads}}(\text{Pt})$ (eV) | $E_{\text{ads,rel}}$ (eV/atom) |
|-------------------------------------------------------|-----------------------|-------------------------|-----------------------------------|----------------------------------|--------------------------------|
| Fe                                                    | -708.46               | -712.65                 | 0.72                              | -1.23                            | +1.95                          |
| Co                                                    | -664.58               | -670.02                 | -0.53                             | -1.23                            | +0.70                          |
| Ru                                                    | -725.96               | -731.50                 | -0.63                             | -1.23                            | +0.60                          |
| Rh                                                    | -660.92               | -666.64                 | -0.80                             | -1.23                            | +0.43                          |
| Re                                                    | -838.57               | -844.22                 | -0.73                             | -1.23                            | +0.50                          |
| Os                                                    | -786.29               | -791.87                 | -0.66                             | -1.23                            | +0.57                          |
| Ir                                                    | -705.70               | -711.48                 | -0.86                             | -1.23                            | +0.37                          |

**Table II. Oxygen adsorption energy of Ptshell-(Re-Ni)core system as a function of sized and oxygen coverage and Ptshell-(Fe-Cn-Fe-Ni)core system as a function of carbon content and oxygen coverage per (111) facet. The adsorption sites are defined as in Figure 3.**

The label of the adsorption site of E and NE specifies that for the E (Edge) one of the oxygen atoms is adsorbed on the site near the edge of the nanoparticle, while for NE (non-Edge) means that all of the adsorbed oxygen are not located at the site near the edge.

| # total atoms                                                                   | # O-atoms /O-Coverage   | Adsorption site | $E_{\text{sys}}$ (eV) | $E_{\text{O/sys}}$ (eV) | $E_{\text{ads}}$ (eV/atom) | $E_{\text{ads,rel}}$ (eV) |   |
|---------------------------------------------------------------------------------|-------------------------|-----------------|-----------------------|-------------------------|----------------------------|---------------------------|---|
| <b>Pt<sub>shell</sub>-(Re-Ni)<sub>core</sub></b>                                |                         |                 |                       |                         |                            |                           |   |
| 116 (NP <sup>**</sup> )                                                         | 1 (0.0128 ML)           | Def             | -838.57               | -844.236                | -0.74                      | -                         |   |
|                                                                                 |                         | A               | -838.57               | -844.238                | -0.75                      | -                         |   |
|                                                                                 |                         | B               | -838.57               | -844.239                | -0.75                      | +0.49                     |   |
|                                                                                 | 2 (0.0256 ML)           | Def & A         | -838.57               | -849.85                 | -0.73                      | -                         |   |
|                                                                                 |                         | Def & B         | -838.57               | -849.86                 | -0.73                      | +0.45                     |   |
|                                                                                 |                         | A & B           | -838.57               | -849.84                 | -0.72                      | -                         |   |
|                                                                                 | 8 (0.103 ML)*           | Def*            | -838.57               | -882.58                 | -0.59                      | +0.59                     |   |
|                                                                                 | 260 (NP <sup>**</sup> ) | 1 (0.007 ML)    | A                     | -1933.92                | -1939.68                   | -0.84                     | - |
|                                                                                 |                         |                 | B                     | -1933.92                | -1939.44                   | -0.60                     | - |
|                                                                                 |                         |                 | C                     | -1933.92                | -1939.69                   | -0.85                     | - |
| D                                                                               |                         |                 | -1933.92              | -1939.82                | -0.98                      | +0.07                     |   |
| E                                                                               |                         |                 | -1933.92              | -1939.45                | -0.61                      | -                         |   |
| F                                                                               |                         |                 | -1933.92              | -1939.68                | -0.85                      | -                         |   |
| G                                                                               |                         |                 | -1933.92              | -1939.50                | -0.66                      | -                         |   |
| 2 (0.014 ML)                                                                    |                         | E01 (A+B)       | -1933.92              | -1944.97                | -0.61                      | -                         |   |
|                                                                                 |                         | E02 (A+C)       | -1933.92              | -1945.18                | -0.71                      | +0.39                     |   |
|                                                                                 |                         | E03 (C+F)       | -1933.92              | -1944.80                | -0.53                      | -                         |   |
|                                                                                 |                         | E04 (F+G)       | -1933.92              | -1944.99                | -0.62                      | -                         |   |
|                                                                                 |                         | NE1 (A+D)       | -1933.92              | -1945.14                | -0.69                      | -                         |   |
|                                                                                 |                         | NE2 (B+D)       | -1933.92              | -1944.96                | -0.60                      | -                         |   |
|                                                                                 |                         | NE3 (C+D)       | -1933.92              | -1945.14                | -0.69                      | -                         |   |
|                                                                                 |                         | NE4 (F+D)       | -1933.92              | -1944.93                | -0.59                      | -                         |   |
| 8 (0.056 ML)*                                                                   | A*                      | -1933.92        | -1978.88              | -0.70                   | +0.40                      |                           |   |
| 45 (SLAB)                                                                       | 1 (0.111 ML)            | P1              | -299.49               | -305.007                | -0.599                     | -                         |   |
|                                                                                 |                         | P2              | -299.49               | -305.008                | -0.600                     | +0.67                     |   |
|                                                                                 |                         | P3              | -299.49               | -305.007                | -0.599                     | -                         |   |
|                                                                                 |                         | P4              | -299.49               | -305.007                | -0.599                     | -                         |   |
|                                                                                 |                         |                 |                       |                         |                            |                           |   |
| <b>Pt<sub>shell</sub>-(Fe-C<sub>n</sub>-Fe-Ni)<sub>core</sub><sup>***</sup></b> |                         |                 |                       |                         |                            |                           |   |
| 284 (Fe <sub>4.6</sub> C <sub>1.0</sub> ) <sup>†</sup>                          | 1 (0.007 ML)            | Def             | -1929.44              | -1937.66                | -3.30                      | -2.07                     |   |
| 296 (Fe <sub>3.1</sub> C <sub>1.0</sub> ) <sup>†</sup>                          |                         | Def             | -2035.20              | -2042.31                | -2.19                      | -0.95                     |   |
| 302 (Fe <sub>2.6</sub> C <sub>1.0</sub> ) <sup>†</sup>                          |                         | Def             | -2085.00              | -2091.69                | -1.77                      | -0.53                     |   |
| 310 (Fe <sub>2.2</sub> C <sub>1.0</sub> ) <sup>†</sup>                          |                         | Def             | -2154.09              | -2157.93                | +1.07                      | +2.30                     |   |

\*For the system of 8 oxygen atoms, 1 oxygen atom per (111) facet is adsorbed at the designated position, where each nanoparticle has eight (111) facets.

\*\*NP = nanoparticle model

\*\*\* For Pt<sub>shell</sub>-(Fe-C<sub>n</sub>-Fe-Ni)<sub>core</sub>, all systems are nanoparticles

Highlight = selected system of the most stable configuration at each oxygen coverage

† the composition of the core-anchoring shell as Fe<sub>x</sub>C<sub>y</sub>

**Table III. Segregation energy for  $Pt_{\text{shell}}-(\text{Re-Ni})_{\text{core}}$  as a function of sizes and oxygen coverage and for  $Pt_{\text{shell}}-(\text{Fe-Cn-Fe-Ni})_{\text{core}}$  as a function of carbon content and oxygen coverage Definitions of the sites are in Figure 3.**

| # total atoms                                                                          | # O-atoms /O-Coverage      | Adsorption site     | $E_{\text{sys}}$ (eV) | $E_{\text{NS}}$ (eV) | $E_{\text{seg}}(\text{Pt-M})^*$ (eV/atom/pair) | $E_{\text{seg}}(\text{Re-Ni})$ (eV/atom/pair) |
|----------------------------------------------------------------------------------------|----------------------------|---------------------|-----------------------|----------------------|------------------------------------------------|-----------------------------------------------|
| <b><math>Pt_{\text{shell}}-(\text{Re-Ni})_{\text{core}}</math></b>                     |                            |                     |                       |                      |                                                |                                               |
| 116<br>(NP <sup>**</sup> )                                                             | 1 (0.0128 ML)              | Def                 | -838.57               | -844.24              | -1.36                                          | N/D                                           |
|                                                                                        |                            | A                   | -838.57               | -844.24              | -7.20                                          | N/D                                           |
|                                                                                        |                            | B                   | -838.57               | -844.24              | -6.52                                          | -0.126                                        |
|                                                                                        | 2 (0.0256 ML)              | Def & A             | -838.57               | -849.85              | -0.394                                         | N/D                                           |
|                                                                                        |                            | Def & B             | -838.57               | -849.86              | -0.22                                          | -0.013                                        |
|                                                                                        |                            | A & B               | -838.57               | -849.84              | -0.397                                         | N/D                                           |
|                                                                                        | 8 (0.103 ML) <sup>‡</sup>  | Def                 | -838.57               | -882.58              | -0.27                                          | +0.11                                         |
|                                                                                        | 260<br>(NP <sup>**</sup> ) | 1 (0.007 ML)        | A                     | -1933.92             | -1939.68                                       | N/D                                           |
| B                                                                                      |                            |                     | -1933.92              | -1939.44             | N/D                                            | N/D                                           |
| C                                                                                      |                            |                     | -1933.92              | -1939.69             | N/D                                            | N/D                                           |
| D                                                                                      |                            |                     | -1933.92              | -1939.82             | -1.06                                          | -0.566                                        |
| E                                                                                      |                            |                     | -1933.92              | -1939.45             | N/D                                            | N/D                                           |
| F                                                                                      |                            |                     | -1933.92              | -1939.68             | N/D                                            | N/D                                           |
| G                                                                                      |                            |                     | -1933.92              | -1939.5              | N/D                                            | N/D                                           |
| 2 (0.014 ML)                                                                           |                            | E01 (A+B)           | -1933.92              | -1944.97             | N/D                                            | N/D                                           |
|                                                                                        |                            | E02 (A+C)           | -1933.92              | -1945.18             | -0.80                                          | -0.147                                        |
|                                                                                        |                            | E03 (C+F)           | -1933.92              | -1944.8              | N/D                                            | N/D                                           |
|                                                                                        |                            | E04 (F+G)           | -1933.92              | -1944.99             | N/D                                            | N/D                                           |
|                                                                                        |                            | NE1 (A+D)           | -1933.92              | -1945.14             | N/D                                            | N/D                                           |
|                                                                                        |                            | NE2 (B+D)           | -1933.92              | -1944.96             | N/D                                            | N/D                                           |
|                                                                                        |                            | NE3 (C+D)           | -1933.92              | -1945.14             | N/D                                            | N/D                                           |
| 45<br>(SLAB)                                                                           | 1 (0.111 ML)               | P1                  | -299.49               | -305.007             | -1.642                                         | N/D                                           |
|                                                                                        |                            | P2                  | -299.49               | -305.008             | -1.640                                         | -1.113                                        |
|                                                                                        |                            | P3                  | -299.49               | -305.007             | -1.957                                         | N/D                                           |
|                                                                                        |                            | P4                  | -299.49               | -305.007             | -1.645                                         | N/D                                           |
|                                                                                        | 1 (0.25 ML)                | Def <sup>****</sup> | -128.8                | -138.72              | -0.93                                          | -0.481                                        |
| <b><math>Pt_{\text{shell}}-(\text{Fe-Cn-Fe-Ni})_{\text{core}}</math><sup>***</sup></b> |                            |                     |                       |                      |                                                |                                               |
| 272 ( $\text{Fe}_{9.2}\text{C}_{1.0}$ ) <sup>†</sup>                                   | 0 (0 ML)                   | Def                 | -1823.07              | -1823.07             | -1.32                                          | N/D                                           |
| 284 ( $\text{Fe}_{4.6}\text{C}_{1.0}$ ) <sup>†</sup>                                   |                            | Def                 | -1929.44              | -1929.44             | -0.56                                          | N/D                                           |
| 296 ( $\text{Fe}_{3.1}\text{C}_{1.0}$ ) <sup>†</sup>                                   |                            | Def                 | -2035.20              | -2035.20             | -0.61                                          | N/D                                           |
| 310 ( $\text{Fe}_{2.2}\text{C}_{1.0}$ ) <sup>†</sup>                                   |                            | Def                 | -2154.09              | -2154.09             | +2.24                                          | N/D                                           |
| 284 ( $\text{Fe}_{4.6}\text{C}_{1.0}$ ) <sup>†</sup>                                   | 1 (0.007 ML)               | Def                 | -1929.44              | -1937.66             | +1.08                                          | N/D                                           |
| 296 ( $\text{Fe}_{3.1}\text{C}_{1.0}$ ) <sup>†</sup>                                   |                            | Def                 | -2035.20              | -2042.31             | -0.02                                          | N/D                                           |
| 302 ( $\text{Fe}_{2.6}\text{C}_{1.0}$ ) <sup>†</sup>                                   |                            | Def                 | -2085.00              | -2091.69             | +0.53                                          | N/D                                           |
| 310 ( $\text{Fe}_{2.2}\text{C}_{1.0}$ ) <sup>†</sup>                                   |                            | Def                 | -2154.09              | -2157.93             | +0.10                                          | N/D                                           |

\*M = Re for  $Pt_{\text{shell}}-(\text{Re-Ni})_{\text{core}}$  and M = Fe for  $Pt_{\text{shell}}-(\text{Fe-Cn-Fe-Ni})_{\text{core}}$

\*\*NP = nanoparticle model

\*\*\* all systems are nanoparticles

\*\*\*\*This adsorption site is at the same position as P1 in 0.111 ML system

‡For the system of 8 oxygen atoms, 1 oxygen atom per (111) facet is adsorbed at the designated position, where each nanoparticle has eight (111) facets.

Highlight = selected system of the most stable configuration at each oxygen coverage

† = the composition of the core-anchoring shell as  $\text{Fe}_x\text{C}_y$

**Table IV. Dissolution potential shift for  $\text{Pt}_{\text{shell}}(\text{Re-Ni})_{\text{core}}$  nanoparticles as a function of sizes and  $\text{Pt}_{\text{shell}}(\text{Fe-C}_n\text{-Fe-Ni})_{\text{core}}$  nanoparticles as a function of carbon content Definitions of the sites are in Figure 9.**

| # total atoms                                                                                         | Adsorption site | $E_{\text{sys},0}$ (eV) | $E_{\text{sys},+}$ (eV) | $E_{\text{dis,alloy}}$ (eV) | $E_{\text{dis,Pt}}$ (eV) | $\Delta E_{\text{dis}}$ (eV) |
|-------------------------------------------------------------------------------------------------------|-----------------|-------------------------|-------------------------|-----------------------------|--------------------------|------------------------------|
| <b><math>\text{Pt}_{\text{shell}}(\text{Re-Ni})_{\text{core}}</math></b>                              |                 |                         |                         |                             |                          |                              |
| 116 (NP <sup>**</sup> )                                                                               | IP              | -838.57                 | -831.58                 | -6.98                       | -6.64                    | -0.34                        |
|                                                                                                       | ED1             | -838.57                 | -832.22                 | -6.35                       | -5.98                    | -0.37                        |
|                                                                                                       | ED2             | -838.57                 | -831.92                 | -6.65                       | -6.24                    | -0.42                        |
| 260 (NP <sup>**</sup> )                                                                               | IP1             | -1933.92                | -1927.27                | -6.65                       | -6.62                    | -0.03                        |
|                                                                                                       | IP2             | -1933.92                | -1926.74                | -7.18                       | -6.92                    | -0.26                        |
|                                                                                                       | IP3             | -1933.92                | -1927.07                | -6.86                       | -6.91                    | +0.05                        |
|                                                                                                       | IP4             | -1933.92                | -1927.26                | -6.67                       | -6.63                    | -0.04                        |
|                                                                                                       | ED1             | -1933.92                | -1927.01                | -6.92                       | -6.32                    | -0.60                        |
|                                                                                                       | ED2             | -1933.92                | -1927.73                | -6.20                       | -5.89                    | -0.30                        |
|                                                                                                       | ED3             | -1933.92                | -1926.97                | -6.95                       | -6.31                    | -0.64                        |
|                                                                                                       | ED4             | -1933.92                | -1927.22                | -6.70                       | -6.32                    | -0.38                        |
| 45 (SLAB)                                                                                             | P1              | -299.49                 | -292.23                 | -7.26                       | -7.29                    | +0.03                        |
|                                                                                                       | P2              | -299.49                 | -292.24                 | -7.26                       | -7.29                    | +0.04                        |
|                                                                                                       | P3              | -299.49                 | -292.23                 | -7.26                       | -7.29                    | +0.03                        |
|                                                                                                       | P4              | -299.49                 | -292.23                 | -7.26                       | -7.29                    | +0.03                        |
| <b><math>\text{Pt}_{\text{shell}}(\text{Fe-C}_n\text{-Fe-Ni})_{\text{core}}</math> <sup>***</sup></b> |                 |                         |                         |                             |                          |                              |
| 272 ( $\text{Fe}_{9.2}\text{C}_{1.0}$ ) <sup>†</sup>                                                  | IP2             | -1823.07                | -1817.13                | -5.94                       | -6.92                    | +0.97                        |
| 284 ( $\text{Fe}_{4.6}\text{C}_{1.0}$ ) <sup>†</sup>                                                  | IP2             | -1929.44                | -1923.68                | -5.76                       | -6.92                    | +1.16                        |
| 296 ( $\text{Fe}_{3.1}\text{C}_{1.0}$ ) <sup>†</sup>                                                  | IP2             | -2035.20                | -2028.69                | -6.52                       | -6.92                    | +0.40                        |
| 302 ( $\text{Fe}_{2.6}\text{C}_{1.0}$ ) <sup>†</sup>                                                  | IP2             | -2085.00                | -2077.33                | -7.68                       | -6.92                    | -0.76                        |
| 310 ( $\text{Fe}_{2.2}\text{C}_{1.0}$ ) <sup>†</sup>                                                  | IP2             | -2154.09                | -2146.81                | -7.28                       | -6.92                    | -0.36                        |

<sup>\*\*</sup>NP = nanoparticle

<sup>\*\*\*</sup> all systems are nanoparticles

<sup>†</sup> the composition of the core-anchoring shell as  $\text{Fe}_x\text{C}_y$
